# Supplementary material
Source: PubMed Central journal article supplement (PMC4482307)

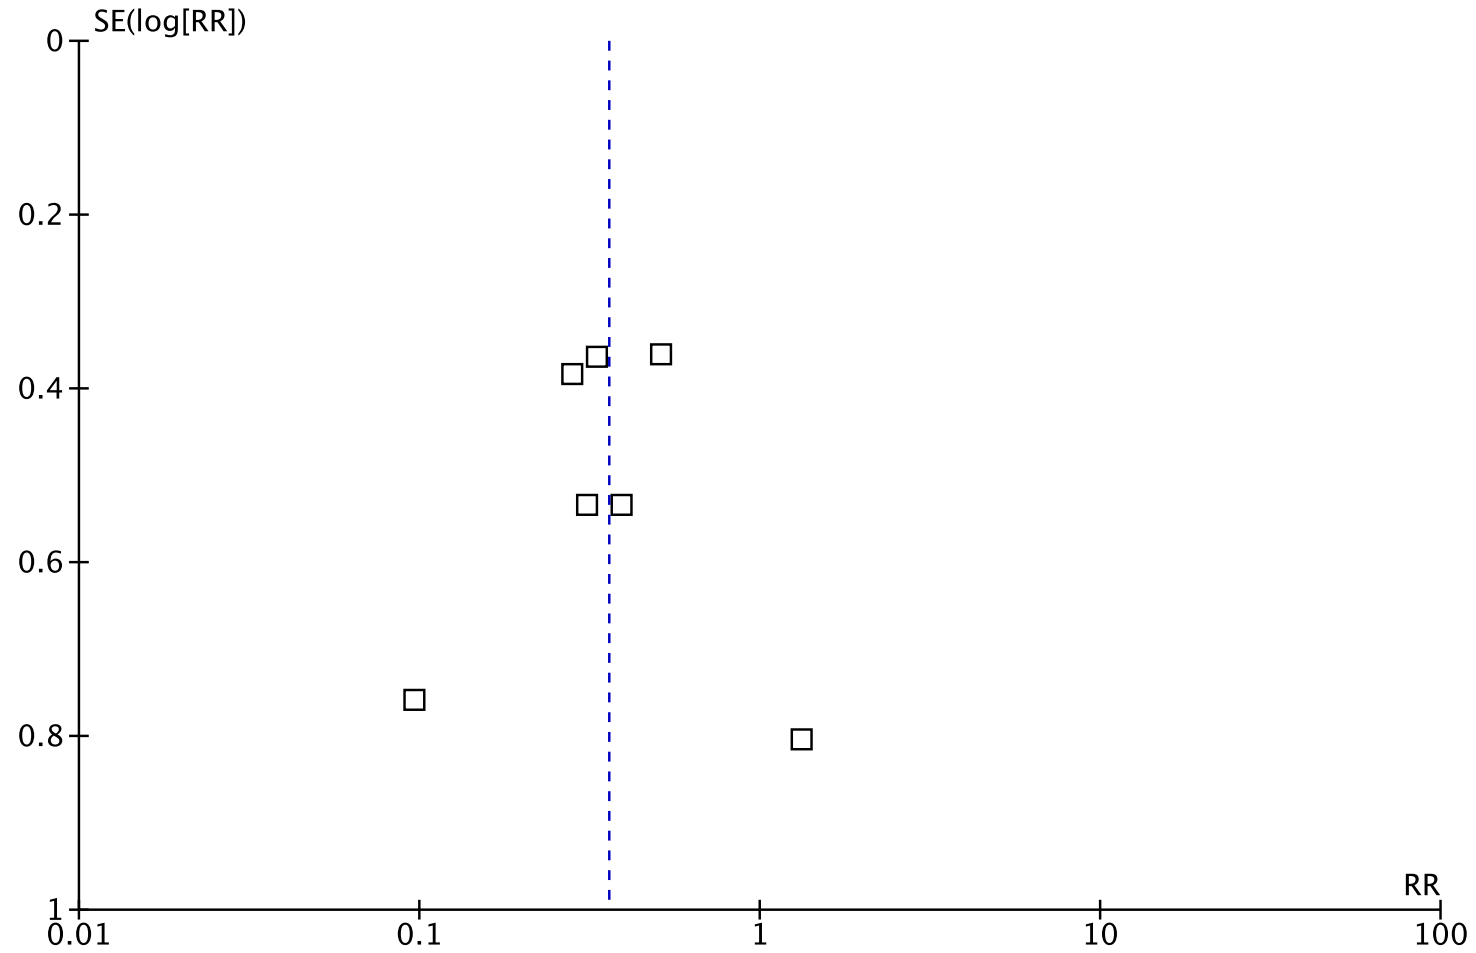

Supplement: Appendix_1.pdf [file Appendix_1.pdf]

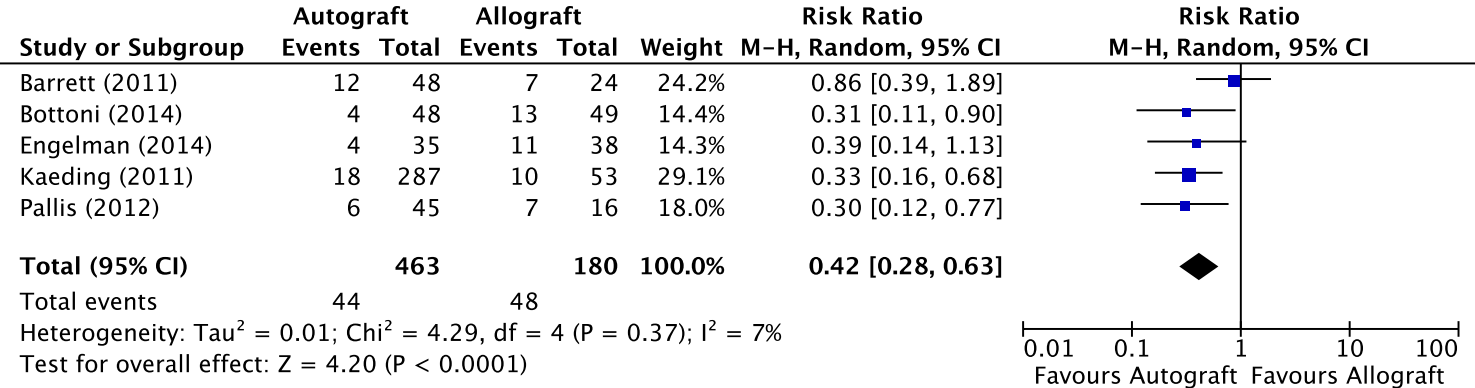

Supplement: Appendix_2A.pdf [file Appendix_2A.pdf]

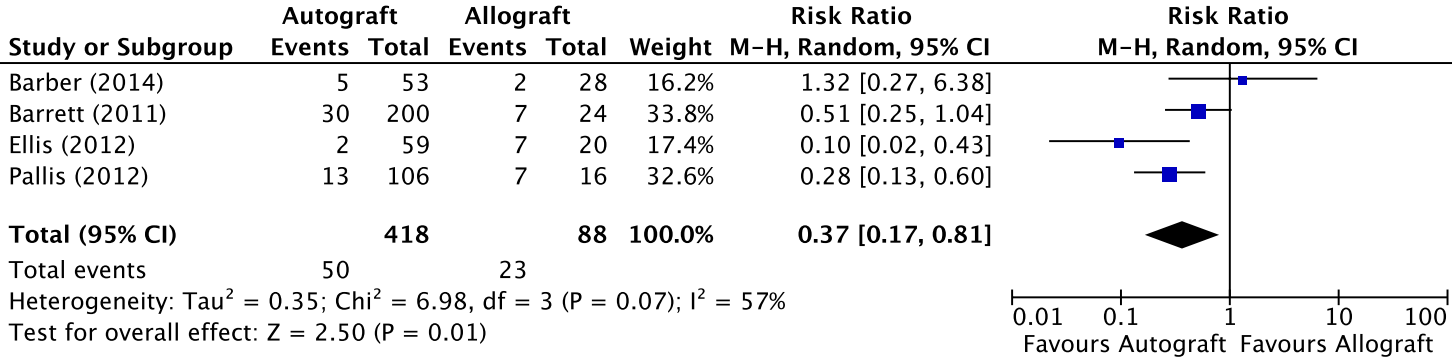

Supplement: Appendix_2B.pdf [file Appendix_2B.pdf]

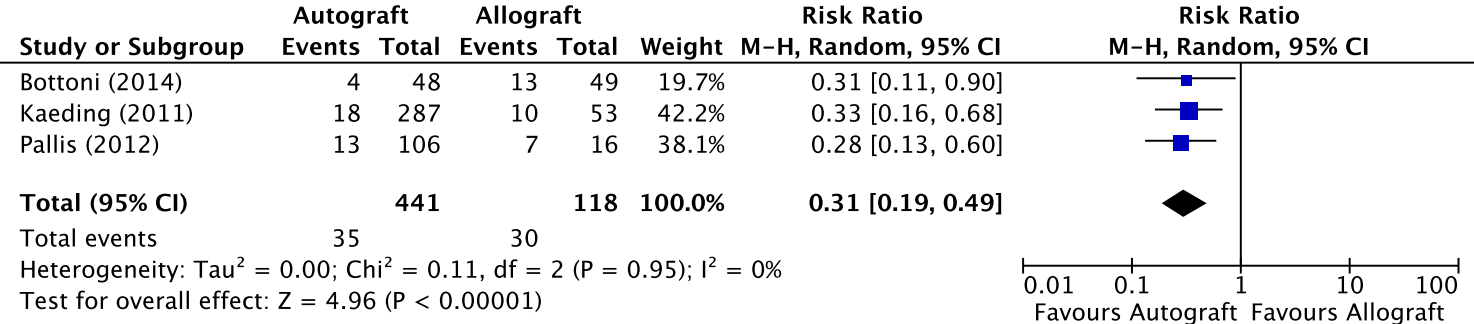

Supplement: Appendix_3A.pdf [file Appendix_3A.pdf]

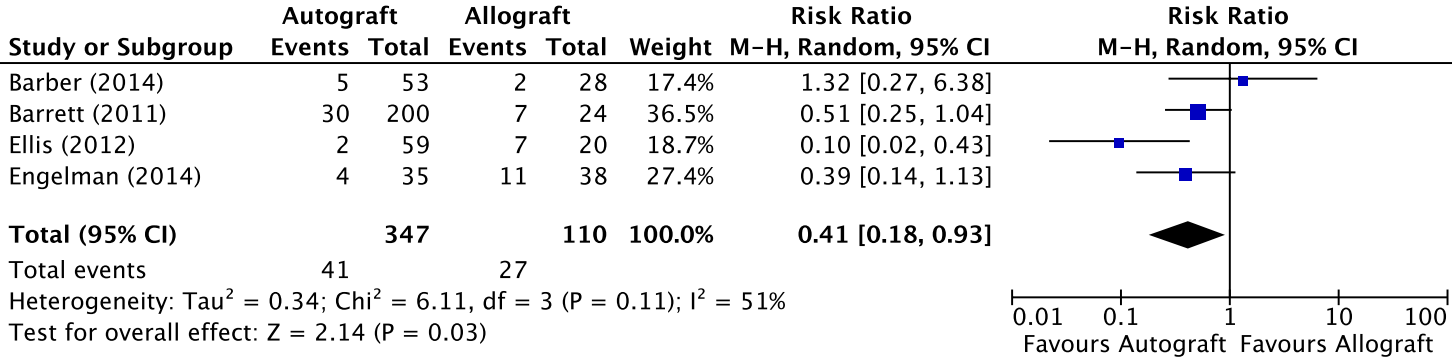

Supplement: Appendix_3B.pdf [file Appendix_3B.pdf]
